# Supplementary material for: Group II truncated haemoglobin YjbI prevents reactive oxygen species-induced protein aggregation in Bacillus subtilis
Source: eLife journal article supplement (doi:10.7554/elife.70467), 2022-09-20

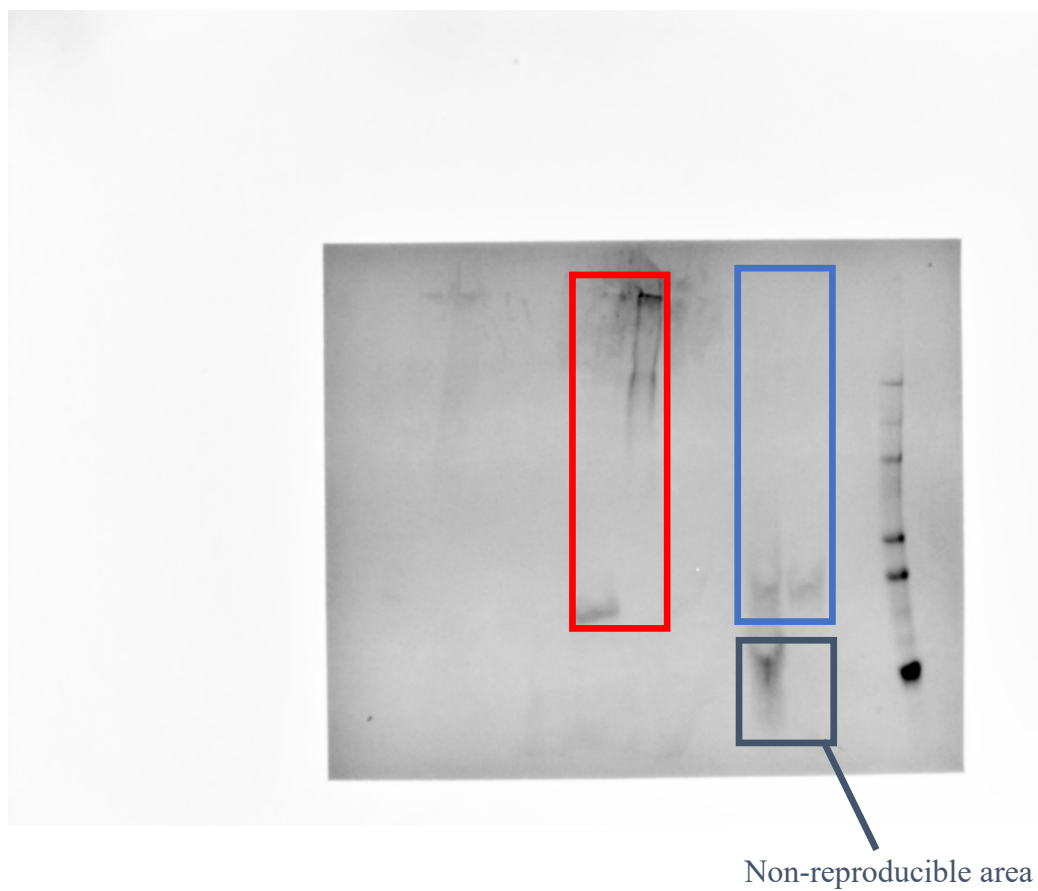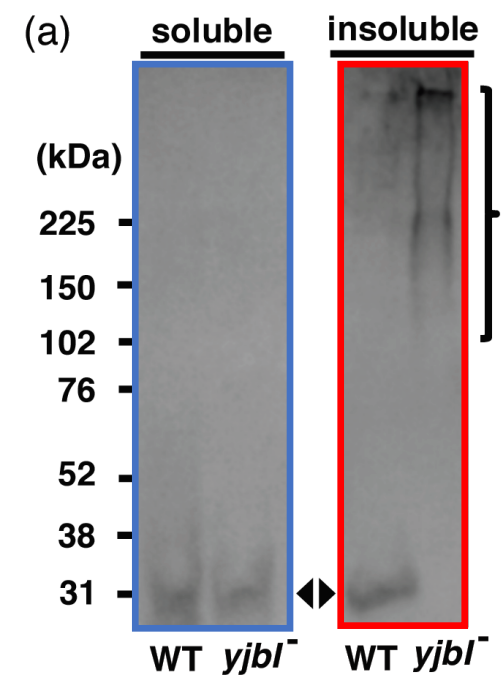

## Reproducibility of result with independent soluble fraction samples

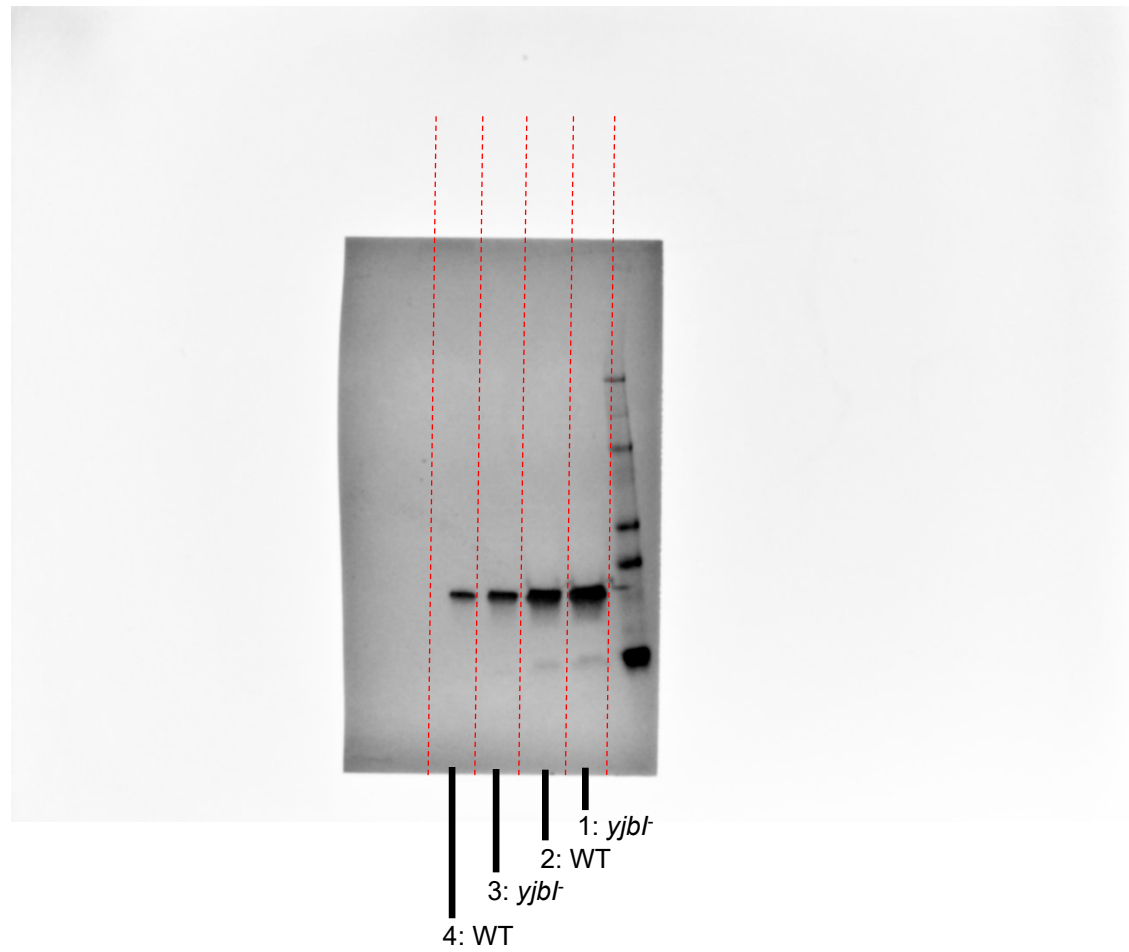

### Reproducibility of result with independent insoluble fraction samples

This experiment used same cell samples as the previous soluble fraction samples (No. 1-4).

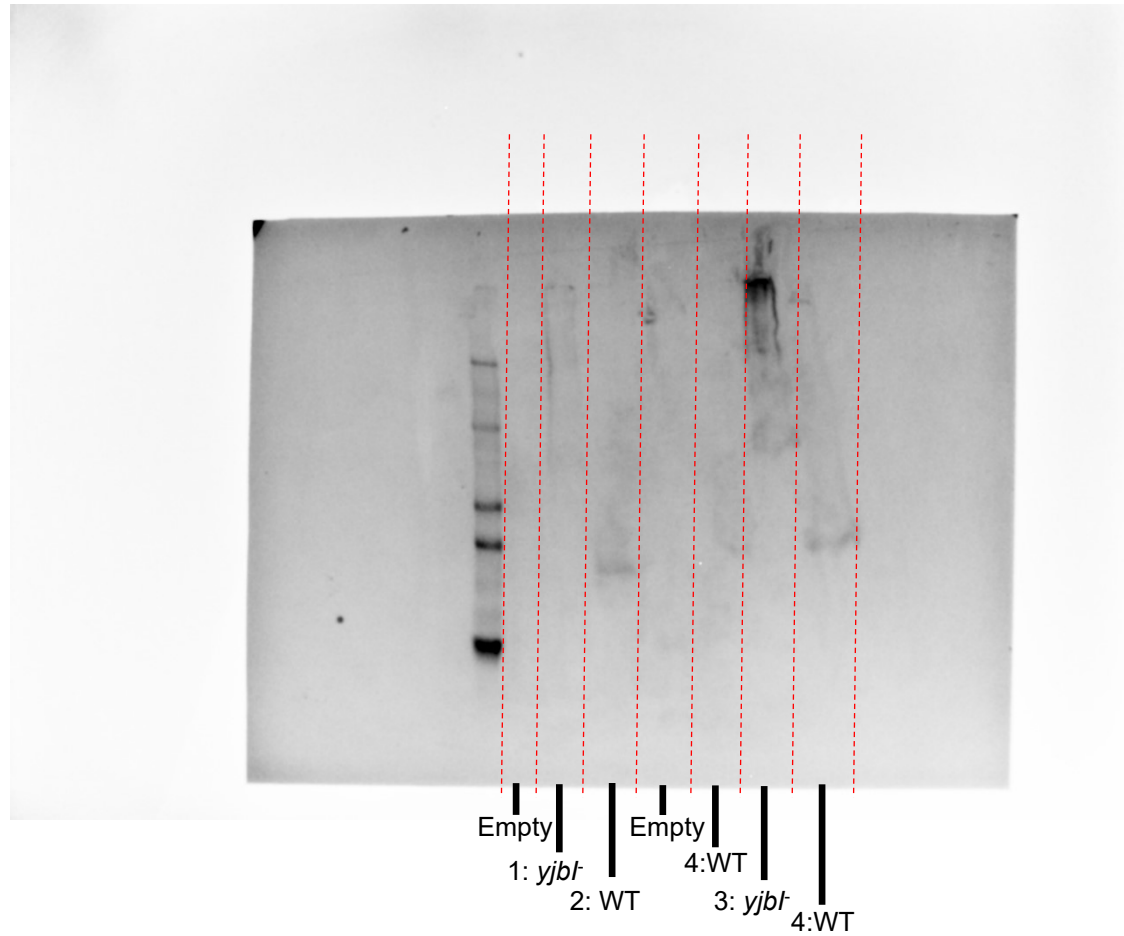

Supplement: fig2-data1 [file Figure 2-source data 1.pdf › Figure 2-source data 1/Figure 2-source data 1.pdf]
