# Supplementary material for: Group II truncated haemoglobin YjbI prevents reactive oxygen species-induced protein aggregation in Bacillus subtilis
Source: eLife journal article supplement (doi:10.7554/elife.70467), 2022-09-20

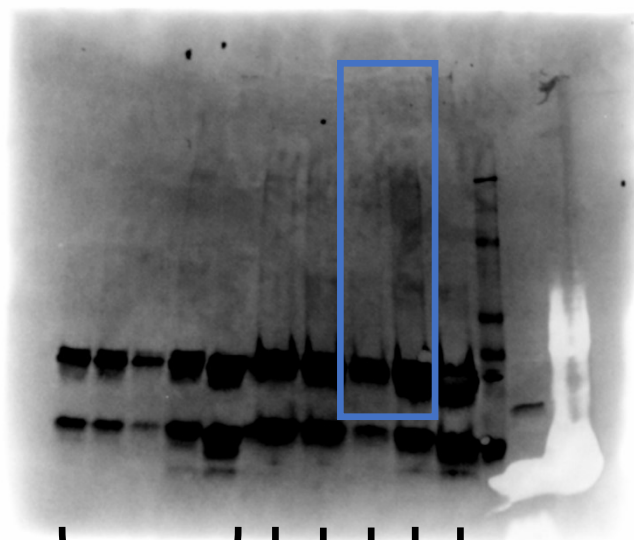

Same samples  
(1/3 volume)

TasA (under Fenton reaction for 10min)  
 TasA (under Fenton reaction for 30 min)  
 TasA + Yjbl (under Fenton reaction for 30 min)  
 TasA + Yjbl (Yjbl was added to Fenton reaction-pretreated (10 min) TasA, then incubated for 30 min)  
 TasA + Yjbl (Yjbl was added to Fenton reaction-pretreated (10 min) TasA, then incubated for 10 min)

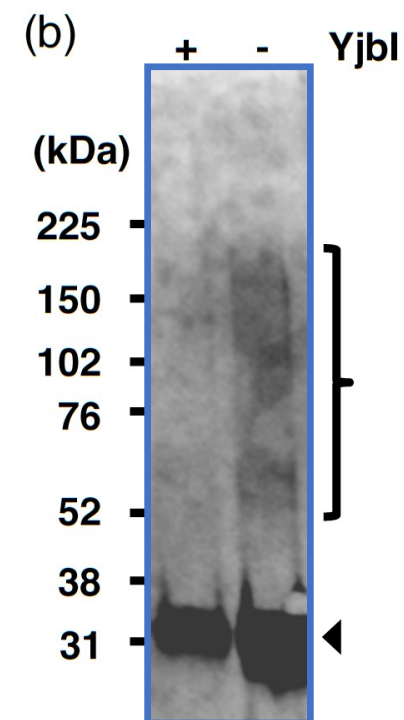

Supplement: fig2-data2 [file elife-70467-fig2-data2-v2.zip]
