# Supplementary figures and images for: Group II truncated haemoglobin YjbI prevents reactive oxygen species-induced protein aggregation in Bacillus subtilis
Source: eLife journal article supplement (doi:10.7554/elife.70467), 2022-09-20

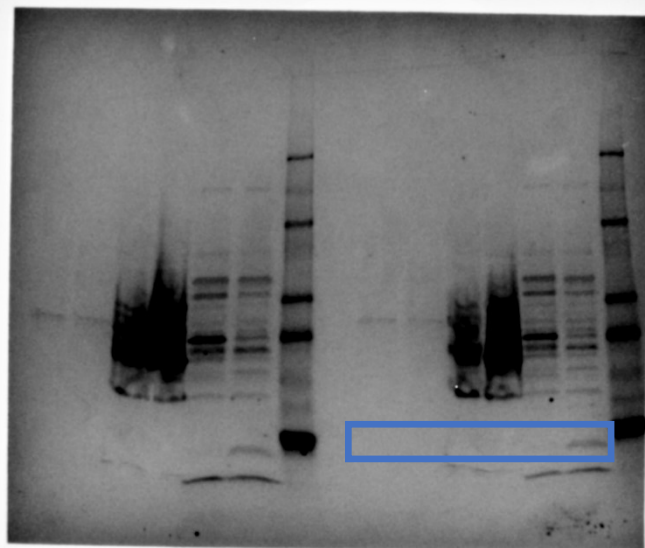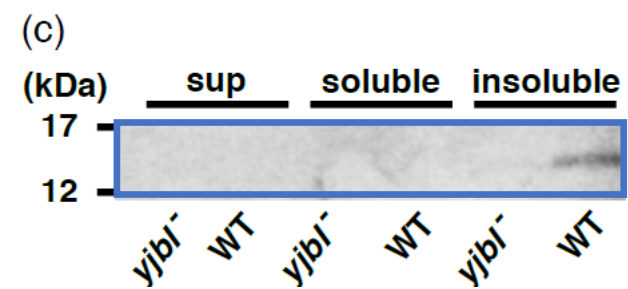

# Property of anti-Yjbl antiserum (Western blotting)

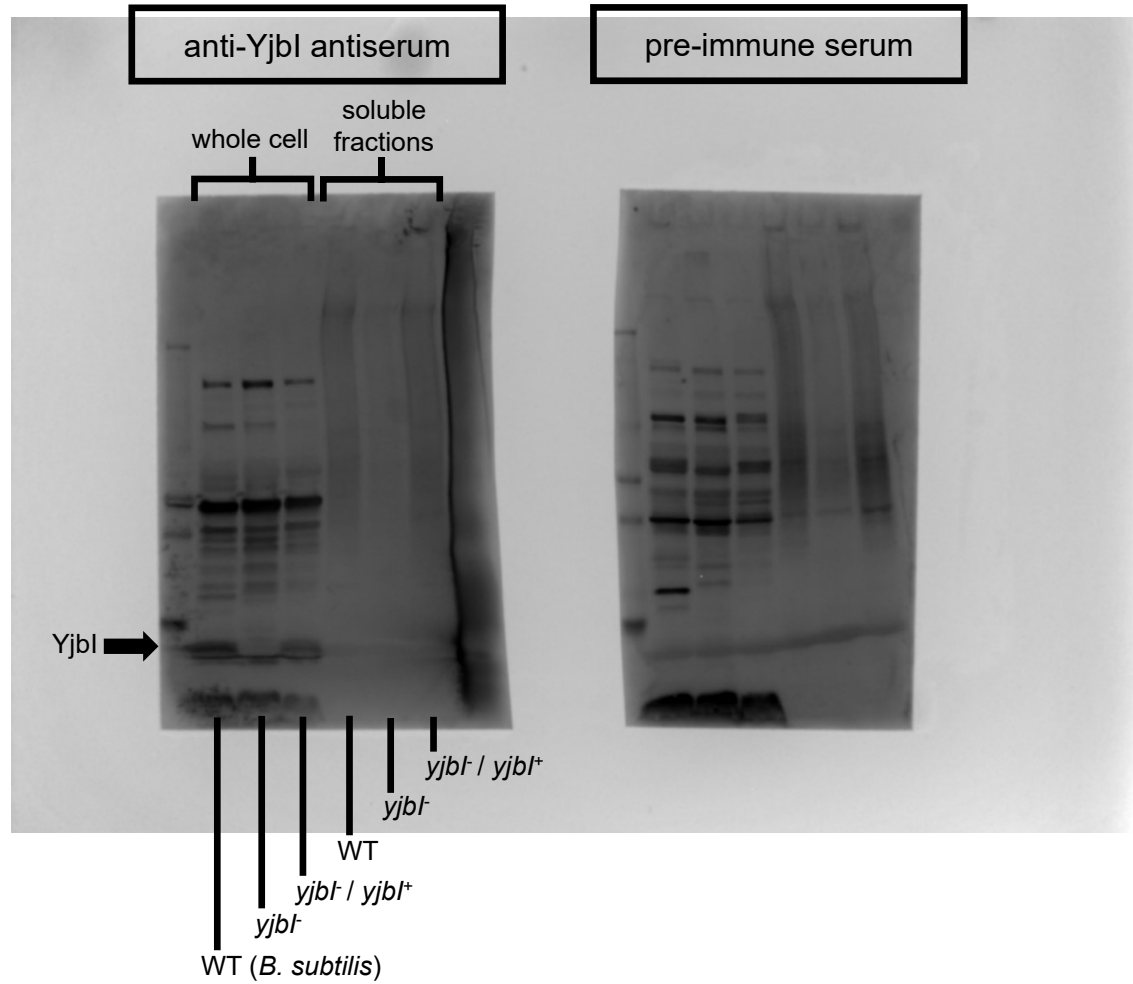

Supplement: fig2-data3 [file elife-70467-fig2-data3-v2.zip]

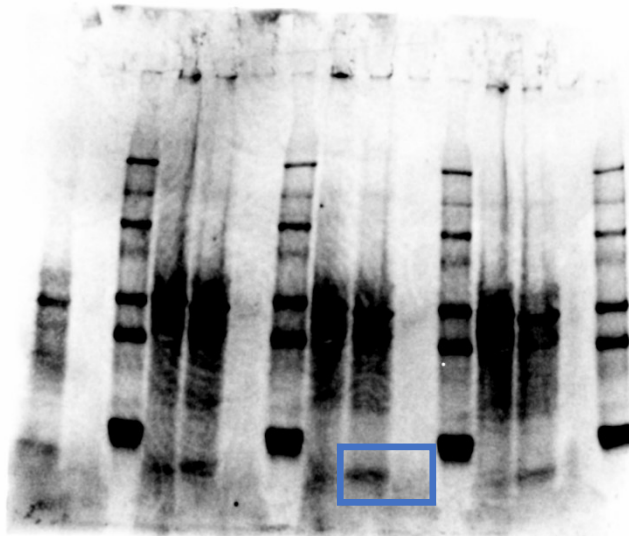

Inversion was applied to the figure.

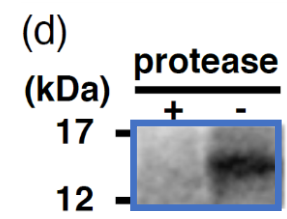

Supplement: fig2-data4 [file elife-70467-fig2-data4-v2.zip]

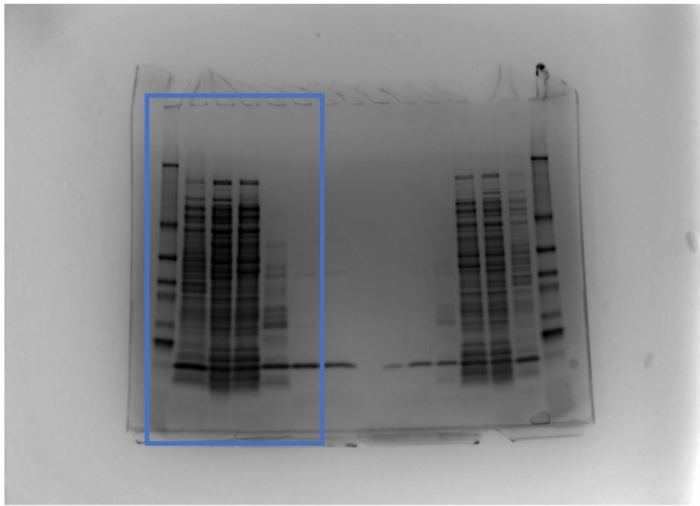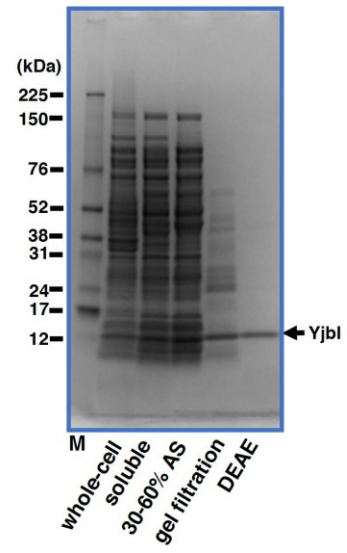

Supplement: fig2-figsupp1-data1 [file Figure 2-figure supplement 1 source data.pdf › Figure 2-figure supplement 1 source data/Figure 2-figure supplement 1 source data.pdf]

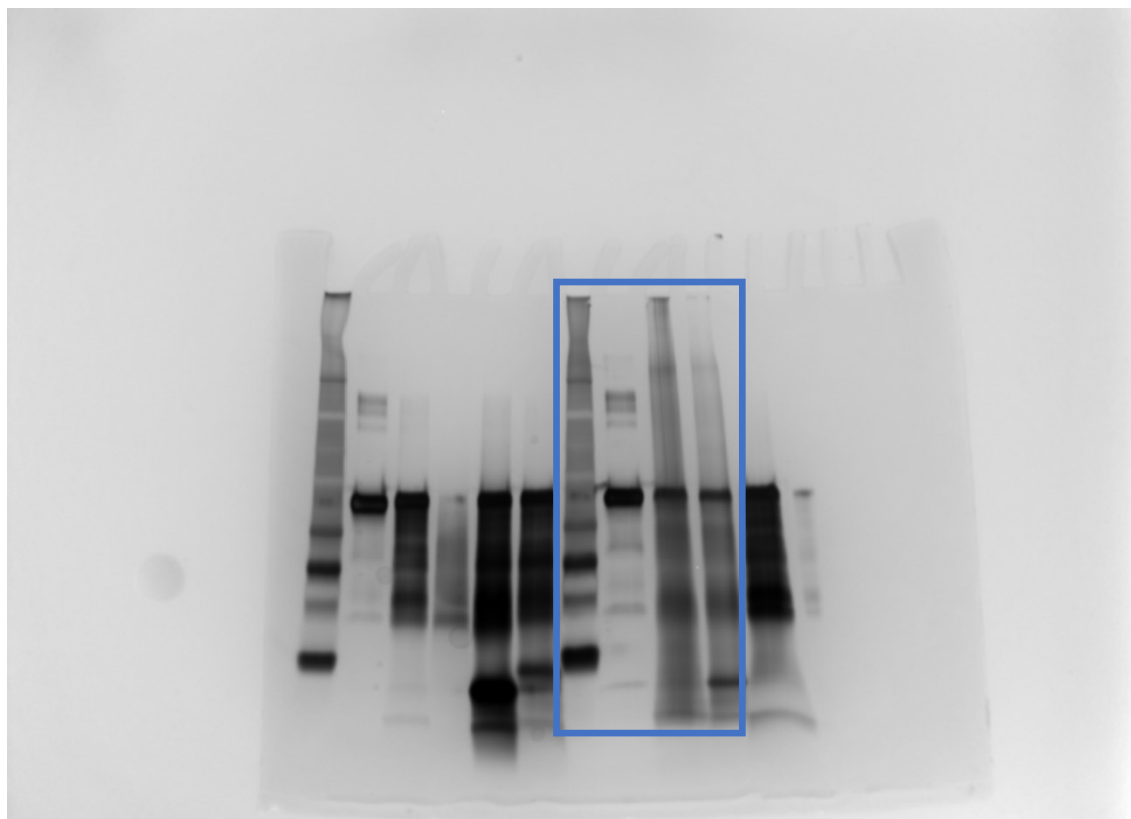

(a)

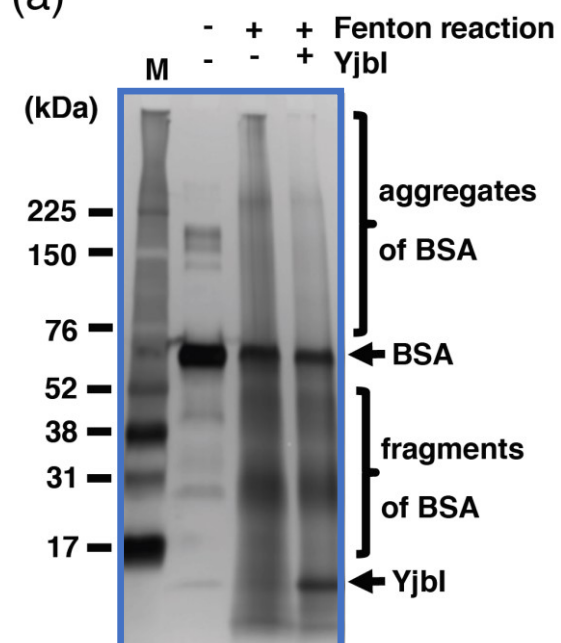

Supplement: fig3-data1 [file elife-70467-fig3-data1-v2.zip]

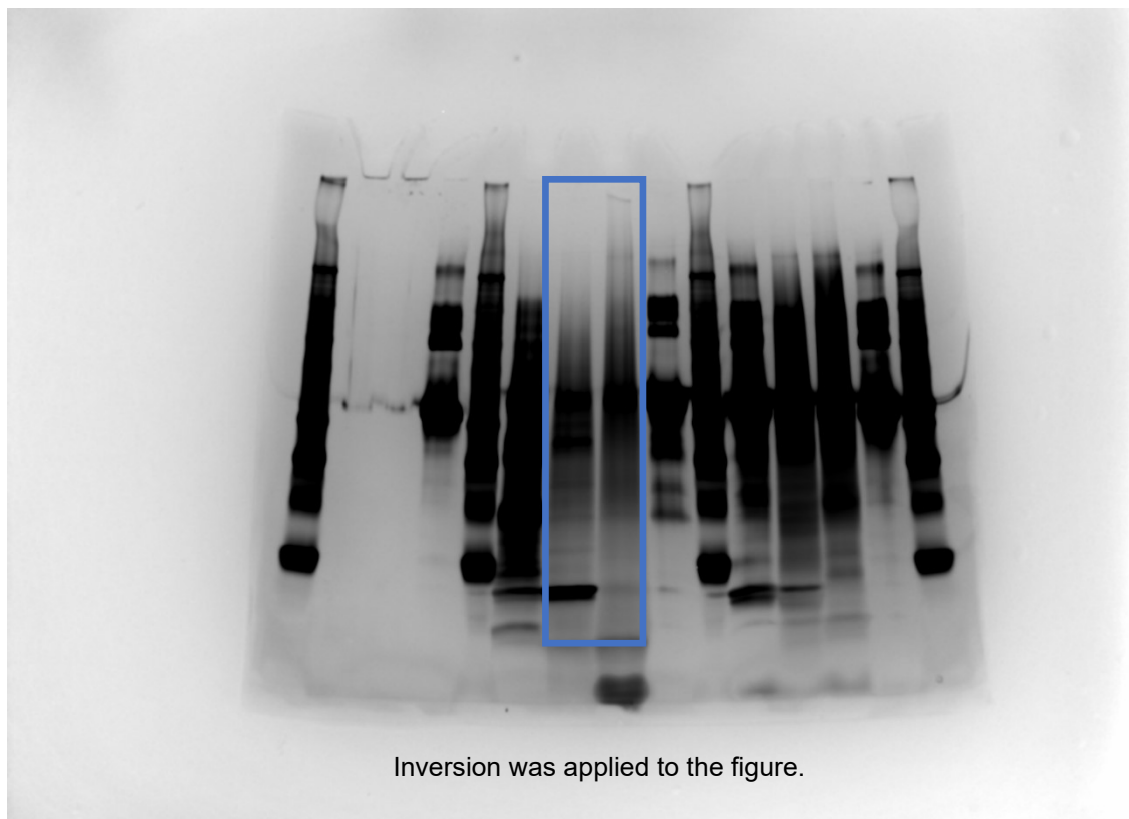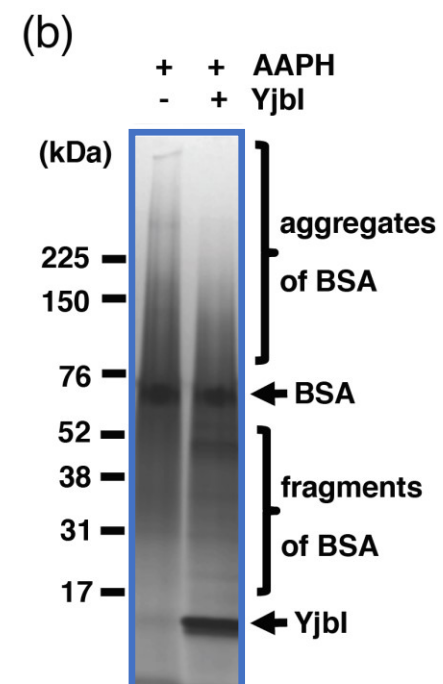

Supplement: fig3-data2 [file Figure 3-source data 2.pdf › Figure 3-source data 2/Figure 3-source data 2.pdf]

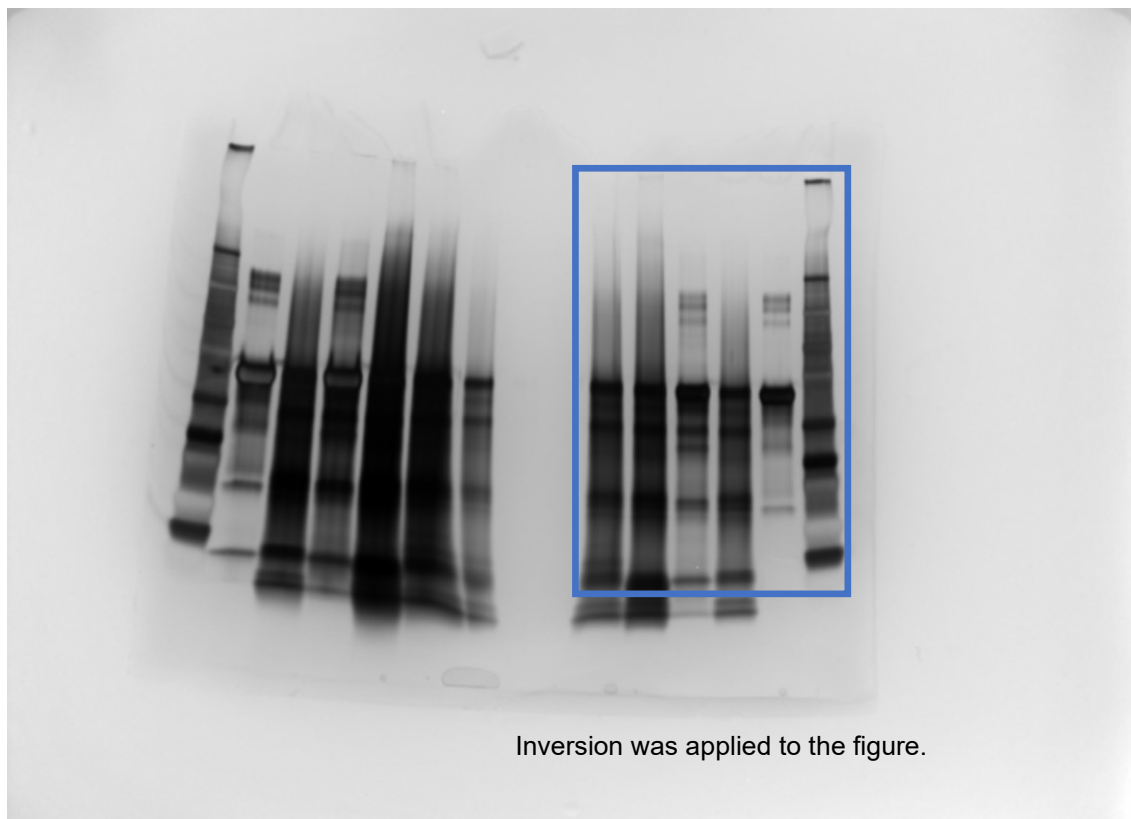

(d)

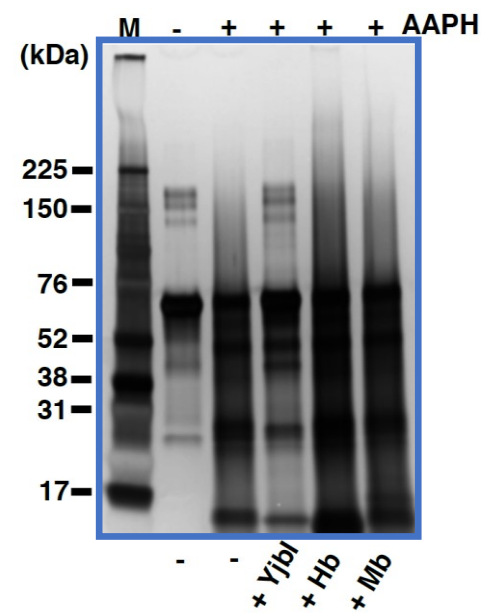

Supplement: fig3-data3 [file elife-70467-fig3-data3-v2.zip]
